# Supplementary material
Source: PubMed Central journal article supplement (PMC3674091)
Supplement: cc-12-1267-s01.pdf [file cc-12-1267-s01.pdf]

## **Supplemental Material to:**

**Valerie Edmond, Galina Merdzhanova, Stephanie Gout,  
Elisabeth Brambilla, Sylvie Gazzeri and Beatrice Eymin**

**A new function of the splicing factor SRSF2 in the  
control of E2F1-mediated cell cycle progression in  
neuroendocrine lung tumors**

**2013; 12(8)**

**<http://dx.doi.org/10.4161/cc.24363>**

**<http://www.landesbioscience.com/journals/cc/article/24363>**

A

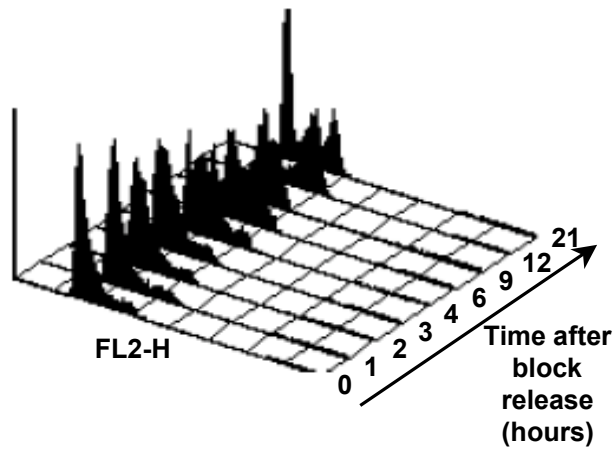

B

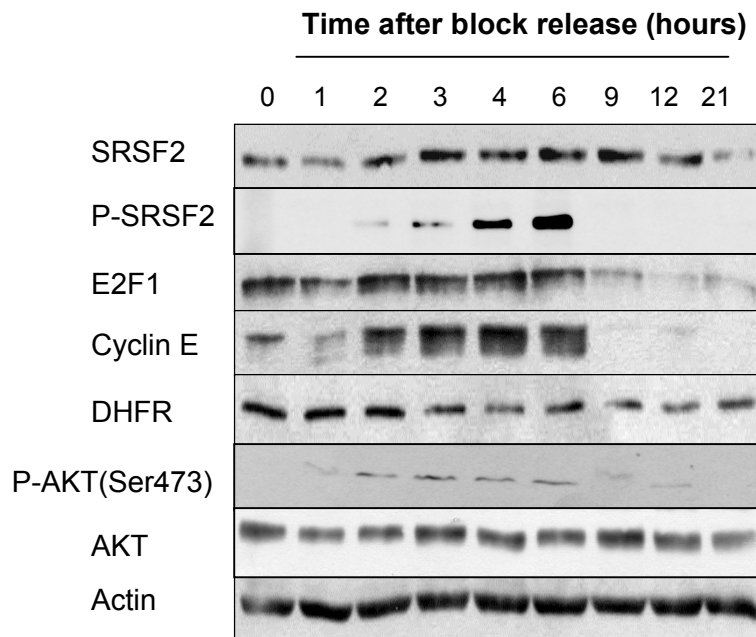

C

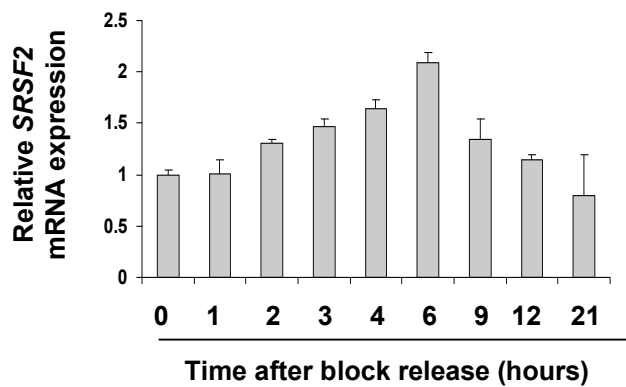

## Supplementary Figure 2

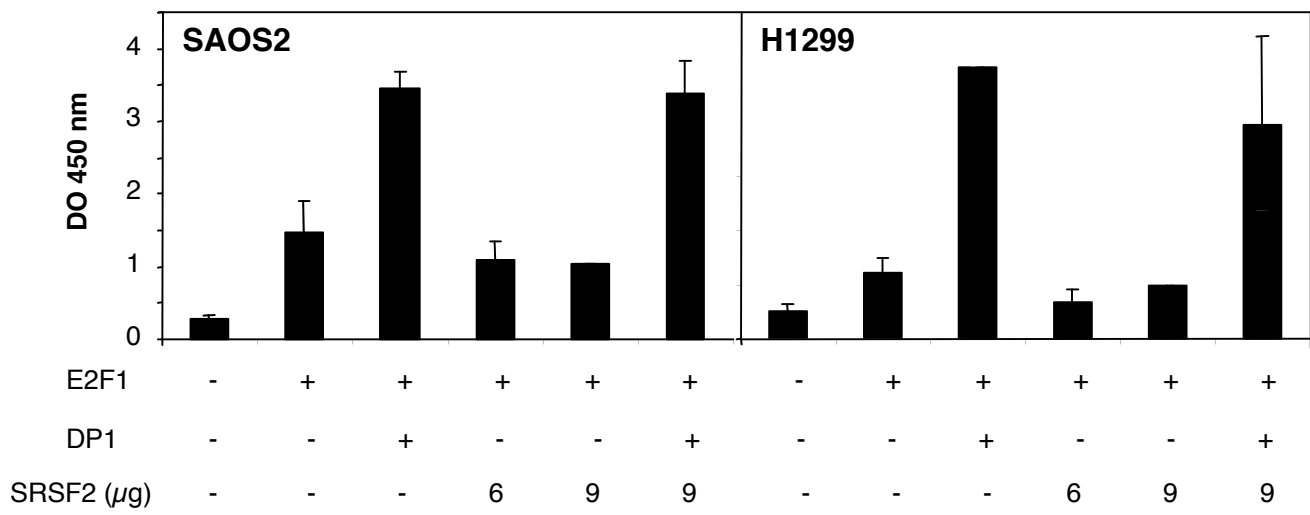

## Supplementary Figures

### Supplementary Figure 1: SRSF2 is a cell-cycle regulated protein

U-2 OS cells were synchronized by a double block of thymidine as described in the Materials and Methods section, then released in thymidine free complete medium and harvested at the indicated time points. **(A)** Cell cycle distribution was assessed by flow cytometry after propidium iodide staining. **(B)** Western blot analysis of SRSF2, E2F1, cyclin E and DHFR proteins was performed at the indicated times after block release. Actin was used as a loading control. **(C)** *SRSF2* transcripts were quantified by RT-QPCR at different times following block release as indicated. Glyceraldehyde-3-phosphate dehydrogenase (*gapdh*) was used as a reference. Relative gene expression was calculated for each sample, as the ratio of *SRSF2* copy number (target gene) to *gapdh* mRNA copy number multiplied by 100, thus normalizing *SRSF2* mRNA expression. The ratio obtained at time 0 (block release) was arbitrarily assigned a value of 1.

### Supplementary Figure 2: SRSF2 overexpression does not increase E2F1 DNA-binding activity.

SAOS-2 and H1299 cells were co-transfected for 48 h with 3  $\mu$ g pCMV-E2F1 in the presence or absence of 9  $\mu$ g pCMV-DP1 and increasing amounts of pcDNA3-SRSF2 (6 and 9  $\mu$ g). Nuclear extracts obtained from Nuclear Extraction Kit (Panomics) were used in an ELISA assay for the analysis of E2F1 DNA-binding activity according to the manufacturer's protocol.

**Supplementary Table 1:** Correlation between P-SRSF2 and Cyclin E protein levels in NE lung tumors.

|                  | P-SRSF2 -  |            | P-SRSF2 +  |            | P      |
|------------------|------------|------------|------------|------------|--------|
|                  | Cyclin E - | Cyclin E + | Cyclin E - | Cyclin E + |        |
| Number of tumors | 6          | 0          | 10         | 11         | 0.0083 |

P-SRSF2 -: tumors without P-SRSF2 overexpression (score  $\leq 100$ ); P-SRSF2 +: tumors overexpressing P-SRSF2 (score  $> 100$ ).  
Cyclin E -: tumors without cyclin E overexpression (score  $< 40$ ); cyclin E +: tumors overexpressing cyclin E (score  $\geq 40$  ).  
P: Chi-2 test.
